# Supplementary material
Source: PubMed Central journal article supplement (PMC6719790)
Supplement: NIHMS1047893-supplement-Supplement.pdf [file NIHMS1047893-supplement-Supplement.pdf]

**Supplementary Materials for**  
**Tumor-homing cytotoxic human induced neural stem cells for cancer  
therapy**

Juli R. Bagó, Onyi Okolie, Raluca Dumitru, Matthew G. Ewend, Joel S. Parker,  
Ryan Vander Werff, T. Michael Underhill, Ralf S. Schmid,  
C. Ryan Miller, Shawn D. Hingtgen\*

\*Corresponding author: Email: hingtgen@email.unc.edu

Published 1 February 2017, *Sci. Transl. Med.* **9**, eaah6510 (2017)  
DOI: 10.1126/scitranslmed.aah6510

**The PDF file includes:**

Legends for Movies S1 to S8

**Other Supplementary Material for this manuscript includes the following:**  
(available at [www.sciencetranslationalmedicine.org/cgi/content/full/9/375/eaah6510/DC1](http://www.sciencetranslationalmedicine.org/cgi/content/full/9/375/eaah6510/DC1))

- Movie S1 (.avi format). h-iNSC<sup>TE</sup> migration to GBM cells.
- Movie S2 (.avi format). Single-cell tracings revealing the migratory paths of h-iNSC<sup>TE</sup> to GBM cells in vitro.
- Movie S3 (.avi format). Rosetta tracings demonstrating the migration of h-iNSC<sup>TE</sup> to GBM cells in vitro.
- Movie S4 (.avi format). Migration of human fibroblasts in the presence of GBM cells.
- Movie S5 (.avi format). Single-cell tracings showing the movement of human fibroblasts cocultured with GBM cells in vitro.
- Movie S6 (.avi format). Rosetta tracings showing the nonoriented movement of human fibroblasts in the presence of GBM cells.
- Movie S7 (.avi format). Blockade of h-iNSC<sup>TE</sup> migration to GBM cells by anti-CXCR4 antibody.
- Movie S8 (.avi format). Single-cell tracings showing the movement of human fibroblasts pretreated with anti-CXCR4 antibody and cocultured with GBM cells.

## **Supplementary Materials**

### **Supplementary movie legends:**

**Supplemental Movie 1. h-iNSC<sup>TE</sup> migration to GBM cells.** Time-lapse video depicting the migration of h-iNSC<sup>TE</sup> to GBM cells (green). Time is displayed in h:min.

**Supplemental Movie 2. Single-cell tracings revealing the migratory paths of h-iNSC<sup>TE</sup>s to GBM cells in vitro.**

**Supplemental Movie 3. Rosetta tracings demonstrating the migration of h-iNSC<sup>TE</sup>s to GBM cells in vitro.**

**Supplemental Movie 4. Migration of human fibroblasts in the presence of GBM cells.** Time-lapse video demonstrating the random movement of human fibroblasts cultured in the presence of human GBM cells (green). Time is displayed in h:min.

**Supplemental Movie 5. Single-cell tracings showing the movement of human fibroblasts cocultured with GBM cells in vitro.**

**Supplemental Movie 6. Rosetta tracings showing the nonoriented movement of human fibroblasts in the presence of GBM cells.**

**Supplemental Movie 7. Blockade of h-iNSC<sup>TE</sup> migration to GBM cells by anti-CXCR4 antibody.** Time-lapse video showing that pre-treatment of h-iNSC<sup>TE</sup> with anti-CXCR4 antibody inhibits migration to GBM cells. Time is displayed in h:min.

**Supplemental Movie 8. Single-cell tracings showing the movement of human fibroblasts pretreated with anti-CXCR4 antibody and cocultured with GBM cells.**
